# Supplementary material for: Structure of human Frizzled5 by fiducial-assisted cryo-EM supports a heterodimeric mechanism of canonical Wnt signaling
Source: eLife. 2020 Aug 7;9:e58464. doi: 10.7554/eLife.58464 (PMC7442489; doi:10.7554/eLife.58464)
Supplement: Figure 2—figure supplement 1—source data 1. [file elife-58464-fig2-figsupp1-data1.xlsx]

## Sheet: Sheet1
Bin Center	Neg Ctrl.	Fzd5 wt	Fzd5 W238A	Fzd5 V281Y	Fzd5 R449A	Fzd5 W520A	Fzd5 W522A	Fzd5 K506A	Fzd5 Y507A	Fzd5 T252F/T534F
1.06	0	0	0	0	0	0	0	0	0	0
1.08	1	0	0	0	0	0	0	0	0	0
1.1	0	0	0	0	0	0	0	0	0	0
1.12	0	0	0	0	0	0	0	0	0	0
1.14	0	0	0	0	0	0	0	0	0	0
1.16	0	0	0	0	0	0	0	0	0	0
1.18	0	0	0	0	0	0	0	0	0	0
1.2	0	0	0	0	0	0	0	0	0	0
1.22	0	0	0	0	0	0	0	0	0	0
1.24	0	0	0	0	0	0	0	0	0	0
1.26	0	0	0	0	0	0	0	0	0	0
1.28	0	0	1	0	0	0	0	0	0	0
1.3	0	0	0	0	0	0	0	0	0	0
1.32	0	0	0	0	0	0	0	0	0	0
1.34	0	0	0	0	0	0	0	0	0	0
1.36	0	0	0	0	0	0	0	0	0	0
1.38	0	0	0	0	0	0	1	0	0	0
1.4	0	0	0	0	0	0	0	0	0	0
1.42	0	0	0	0	0	0	0	0	0	0
1.44	0	0	0	0	0	0	0	0	0	0
1.46	0	0	0	0	0	0	0	0	0	0
1.48	0	0	0	0	0	0	0	0	0	0
1.5	0	0	0	0	0	0	0	0	0	0
1.52	0	0	0	0	0	0	0	0	0	0
1.54	0	0	0	0	0	0	0	0	0	0
1.56	0	0	0	0	0	0	0	0	0	0
1.58	0	0	0	0	0	0	0	0	0	0
1.6	0	0	0	0	0	0	0	0	0	0
1.62	0	0	0	0	0	0	0	0	0	0
1.64	0	0	0	0	0	0	0	0	0	0
1.66	0	0	0	0	0	0	0	0	0	1
1.68	0	0	0	0	0	0	0	0	0	0
1.7	0	0	0	0	0	0	0	0	0	0
1.72	0	0	0	0	0	0	0	0	0	0
1.74	0	0	0	0	0	1	0	0	0	0
1.76	0	0	0	0	0	0	0	0	0	0
1.78	0	0	0	0	0	0	0	0	0	0
1.8	0	0	0	0	0	0	0	0	0	0
1.82	0	0	0	0	0	0	0	0	0	0
1.84	0	0	0	0	0	0	0	0	0	0
1.86	0	0	0	0	0	0	0	0	0	0
1.88	0	0	0	0	0	0	0	0	0	0
1.9	0	0	0	0	0	0	0	0	0	0
1.92	0	0	0	0	0	0	0	0	0	0
1.94	0	0	0	0	0	0	0	0	0	0
1.96	0	0	0	0	0	0	0	0	0	0
1.98	0	0	0	0	0	0	0	0	0	0
2	0	0	0	0	0	0	0	0	0	0
2.02	0	1	0	1	0	0	0	0	0	0
2.04	0	0	0	0	0	0	0	0	0	0
2.06	0	0	0	1	0	0	0	0	0	0
2.08	0	0	0	1	0	0	0	2	0	0
2.1	0	0	0	0	0	0	0	0	0	0
2.12	1	0	0	1	0	0	0	0	0	0
2.14	0	0	0	0	1	2	0	1	0	1
2.16	0	0	0	0	0	0	0	0	1	0
2.18	0	0	0	0	0	0	0	1	1	1
2.2	0	0	0	0	0	0	0	1	0	0
2.22	1	1	0	0	1	1	0	1	0	4
2.24	1	1	0	0	0	0	0	1	1	0
2.26	1	2	0	0	0	0	0	0	2	0
2.28	1	1	0	2	0	0	0	0	0	0
2.3	1	0	1	2	0	0	0	3	2	0
2.32	0	0	0	1	0	0	0	4	0	0
2.34	0	0	0	3	1	0	0	1	2	0
2.36	1	0	1	0	0	0	0	6	3	2
2.38	3	0	1	0	1	0	1	3	2	1
2.4	3	2	3	0	2	1	0	3	2	0
2.42	4	0	1	0	2	2	0	4	4	4
2.44	3	0	2	0	0	1	0	11	1	1
2.46	4	2	2	0	0	0	1	9	5	1
2.48	8	0	2	2	2	2	0	8	1	2
2.5	12	1	0	0	2	0	2	7	4	2
2.52	8	1	1	2	1	2	0	10	2	0
2.54	15	1	3	2	5	0	1	19	14	1
2.56	12	1	3	1	7	5	1	13	6	2
2.58	15	2	2	4	3	0	3	13	11	3
2.6	22	2	8	6	6	6	1	24	9	7
2.62	23	0	8	4	8	4	0	24	19	2
2.64	22	2	5	5	7	2	1	36	16	3
2.66	28	3	6	2	6	4	4	35	20	3
2.68	33	6	10	6	7	6	2	43	30	3
2.7	38	3	14	7	10	5	4	50	35	9
2.72	40	3	11	8	9	8	2	53	36	11
2.74	45	3	12	5	20	6	5	78	32	3
2.76	72	5	18	8	19	11	5	83	63	9
2.78	60	9	21	8	14	11	4	76	55	7
2.8	70	8	21	12	14	11	3	105	63	11
2.82	88	7	26	16	20	14	6	124	65	17
2.84	85	9	30	16	16	16	4	112	71	12
2.86	71	9	28	12	32	14	6	131	81	12
2.88	94	12	37	12	17	16	10	149	86	16
2.9	105	10	41	22	36	21	13	158	89	14
2.92	117	9	40	25	40	26	12	145	108	20
2.94	107	18	41	25	26	15	7	169	102	30
2.96	114	15	45	34	45	27	11	193	106	29
2.98	117	10	45	33	40	29	18	201	118	24
3	135	19	43	27	32	25	20	220	120	34
3.02	132	24	54	31	32	24	21	211	144	19
3.04	130	23	42	27	43	25	24	242	147	28
3.06	147	16	72	37	44	34	25	224	137	28
3.08	150	24	72	43	61	25	21	228	156	36
3.1	139	29	77	49	46	48	19	239	172	29
3.12	158	25	92	42	54	43	26	230	154	39
3.14	179	31	80	46	54	48	24	270	168	39
3.16	148	28	99	50	65	38	26	237	184	37
3.18	144	24	88	40	73	43	28	222	175	32
3.2	147	32	80	58	61	63	29	264	182	43
3.22	159	29	90	48	86	43	36	228	205	44
3.24	160	36	81	64	68	45	37	267	192	51
3.26	170	29	92	57	69	64	31	239	183	46
3.28	160	39	111	71	73	43	40	249	224	58
3.3	177	43	103	60	75	56	31	206	193	51
3.32	163	33	120	79	90	58	38	244	203	44
3.34	156	40	124	65	81	61	44	248	207	47
3.36	174	39	121	69	105	74	43	241	187	57
3.38	156	49	107	84	105	55	46	195	200	47
3.4	147	53	104	74	76	74	64	181	184	71
3.42	163	43	98	76	90	83	55	215	193	49
3.44	147	44	141	90	78	61	47	211	177	54
3.46	149	51	120	78	95	68	61	178	191	56
3.48	125	52	129	98	92	109	61	178	223	65
3.5	132	53	115	86	121	90	57	153	206	59
3.52	131	66	145	96	102	85	50	139	195	59
3.54	133	58	123	87	101	78	56	145	166	74
3.56	115	59	137	95	97	71	67	153	154	67
3.58	138	73	128	109	111	105	79	127	149	78
3.6	96	84	148	115	111	98	53	108	170	63
3.62	118	74	139	104	111	81	80	103	161	77
3.64	96	61	141	107	115	105	75	138	156	86
3.66	84	80	117	122	108	97	71	83	136	70
3.68	83	82	134	94	116	88	65	101	139	82
3.7	87	82	124	89	95	92	74	82	127	67
3.72	78	87	136	103	100	82	79	69	149	77
3.74	76	84	129	96	113	100	68	74	154	83
3.76	79	81	110	80	103	88	81	76	148	100
3.78	77	89	135	103	107	122	84	70	111	74
3.8	70	92	109	109	74	79	66	49	107	79
3.82	55	84	114	106	99	90	96	57	109	83
3.84	57	94	114	106	111	98	87	36	99	82
3.86	54	89	119	104	114	103	78	36	101	90
3.88	54	89	113	97	107	107	80	29	101	92
3.9	50	88	106	105	100	84	82	28	89	89
3.92	38	91	118	110	83	110	95	38	74	100
3.94	41	102	125	111	87	92	90	25	88	89
3.96	40	96	90	110	84	103	82	25	71	85
3.98	43	99	108	94	96	87	77	20	84	79
4	39	104	105	95	88	69	66	18	64	108
4.02	26	94	101	87	92	99	84	12	64	93
4.04	26	116	126	82	78	86	95	27	53	84
4.06	32	83	96	93	80	74	74	18	49	88
4.08	35	118	127	85	85	83	73	20	45	91
4.1	22	106	106	94	104	75	88	9	42	102
4.12	28	114	108	97	71	85	61	10	39	106
4.14	23	102	68	82	74	79	94	5	45	89
4.16	29	104	91	82	70	69	96	9	37	92
4.18	16	111	90	90	76	79	69	12	38	110
4.2	22	92	99	86	74	68	72	6	36	88
4.22	17	114	105	72	85	62	74	9	34	88
4.24	19	96	101	72	72	80	72	6	29	90
4.26	17	111	86	87	71	75	64	5	34	85
4.28	13	110	96	74	75	79	90	3	24	85
4.3	18	93	83	85	78	95	66	8	25	101
4.32	18	101	101	77	94	60	61	1	28	93
4.34	10	111	81	72	73	74	74	5	27	89
4.36	13	97	106	82	61	66	64	6	15	77
4.38	14	94	92	79	82	60	74	2	11	86
4.4	14	88	87	92	73	66	70	3	12	88
4.42	7	95	79	76	79	73	55	4	21	81
4.44	10	114	83	80	113	65	48	4	14	75
4.46	11	86	93	83	92	68	55	4	15	90
4.48	7	87	86	82	75	69	53	3	9	84
4.5	7	77	63	84	95	72	49	5	6	72
4.52	13	83	73	73	103	65	56	1	10	61
4.54	11	80	76	89	99	71	51	1	6	65
4.56	3	82	77	87	98	73	59	1	10	72
4.58	7	78	81	90	100	72	55	4	15	72
4.6	5	90	62	92	97	81	52	1	9	66
4.62	3	67	61	83	83	75	61	1	6	59
4.64	3	73	54	79	93	81	53	3	8	57
4.66	4	71	77	75	99	83	49	2	5	73
4.68	1	74	73	100	100	73	58	1	8	57
4.7	8	58	61	78	87	82	59	2	4	69
4.72	5	72	62	85	102	89	61	1	2	57
4.74	8	78	72	79	87	82	73	2	6	60
4.76	6	65	46	85	106	122	68	1	3	46
4.78	6	77	53	78	97	78	52	0	4	70
4.8	2	66	54	76	85	96	86	2	10	53
4.82	8	68	51	83	95	106	67	3	12	52
4.84	8	63	47	101	78	114	67	0	7	61
4.86	4	58	44	100	76	104	84	0	4	58
4.88	5	64	46	88	74	94	79	1	2	42
4.9	8	66	44	81	84	107	75	1	4	55
4.92	5	80	35	87	66	114	77	0	1	48
4.94	2	86	39	89	75	95	72	1	3	53
4.96	9	79	27	97	72	122	64	0	3	53
4.98	5	71	28	87	72	99	67	0	2	50
5	9	78	22	96	60	87	72	1	5	45
5.02	4	71	22	90	63	95	77	1	2	52
5.04	6	71	21	79	60	96	83	2	0	59
5.06	1	70	23	92	53	110	75	2	3	46
5.08	4	78	20	78	46	114	77	1	2	55
5.1	1	101	16	80	51	87	70	0	0	59
5.12	2	82	12	82	44	97	64	1	2	49
5.14	3	84	15	71	41	76	80	1	0	48
5.16	2	77	14	56	53	73	60	1	1	42
5.18	2	70	17	66	36	68	68	0	2	39
5.2	0	76	12	70	33	80	64	0	1	71
5.22	1	85	11	44	29	77	59	2	0	62
5.24	1	84	20	49	26	74	63	1	1	41
5.26	2	61	7	46	25	71	63	1	1	53
5.28	3	93	8	36	21	62	52	0	1	52
5.3	0	80	12	45	24	50	55	1	0	65
5.32	0	76	8	48	20	58	56	0	0	72
5.34	2	74	2	36	15	59	63	0	0	69
5.36	0	71	4	37	21	46	42	0	0	52
5.38	0	68	3	24	13	39	42	0	0	64
5.4	0	61	3	21	13	36	46	0	0	75
5.42	0	70	3	24	13	34	37	1	1	72
5.44	2	73	1	29	9	39	37	0	0	81
5.46	1	60	2	21	6	28	37	0	2	71
5.48	0	65	1	27	10	25	27	0	0	67
5.5	0	49	1	14	3	37	28	0	1	68
5.52	2	46	3	13	5	27	25	0	0	79
5.54	0	65	0	12	7	32	20	0	0	75
5.56	0	46	1	10	2	28	14	0	0	83
5.58	0	49	2	12	7	27	25	0	0	91
5.6	0	47	1	12	5	9	14	0	0	73
5.62	0	52	0	6	2	19	13	0	0	71
5.64	0	34	0	3	5	17	17	0	0	81
5.66	1	30	1	8	7	12	7	0	0	61
5.68	0	41	0	11	4	10	15	0	1	64
5.7	0	34	0	3	4	12	12	0	0	52
5.72	0	23	0	0	3	10	9	0	0	62
5.74	0	21	0	5	1	8	8	0	0	60
5.76	0	26	0	2	0	7	8	0	0	46
5.78	0	24	1	5	0	9	3	0	0	54
5.8	1	16	0	2	0	4	7	0	0	42
5.82	0	11	0	1	1	7	5			30
5.84	0	20	0	2	0	3	3			48
5.86	0	9	0	0	1	3	1			33
5.88	0	15	0	0	0	5	0			28
5.9	0	6	0	1	0	1	3			30
5.92	0	6	0		0	3	0			24
5.94	0	3	0		1	1	2			18
5.96	0	4	0		0	0				16
5.98	0	0	0			1				22
6	0	7	0			0				19
6.02	0	1	0			0				22
6.04	0	0	0			1				10
6.06	0	2	0			0				10
6.08	0	1	0			0				9
6.1	0	0	0			0				9
6.12	0	2	0			0				7
6.14	0	1	0			0				3
6.16	0	0	0			1				7
6.18	0	0	0			0				5
6.2	0	1	0							4
6.22	0	0	0							3
6.24	0	0	0							4
6.26	0	0	0							1
6.28	0	1	0							2
6.3	0		0							1
6.32	0		0							2
6.34	0		0							0
6.36	0		0							1
6.38	0		1							0
6.4										0
6.42										0
6.44										0
6.46										2
