# Supplementary material for: Structure of human Frizzled5 by fiducial-assisted cryo-EM supports a heterodimeric mechanism of canonical Wnt signaling
Source: eLife. 2020 Aug 7;9:e58464. doi: 10.7554/eLife.58464 (PMC7442489; doi:10.7554/eLife.58464)
Supplement: Figure 4—source data 1. [file elife-58464-fig4-data1.xlsx]

## Sheet: Sheet1
Wnt3a (nM)	Fzd5 W238A			Fzd5 V281Y			Fzd5 R449A			Fzd5 W520A			Fzd5 W522A			Fzd5 Y507A			Fzd5 K506A			Fzd5 T252F/T534F			Fzd5 wt			Neg Ctrl.
0	0.492326	0.558442	1.03188	0.687234	1.16497	0.945502	0.555642	0.863813	1.00623	0.673718	0.971522	1.60456	0.982723	1.66275	0.898096	1.5028	0.958567	1.89026	1.05063	0.708032	1.2973	0.685039	0.903543	0.897638	0.685039	0.903543	0.897638	1.37327	1.1384	0.961785
1.5625	0.952774	1.32822	2.32231	2.40532	2.8354	3.93386	0.607004	0.387549	0.723735	1.29699	1.99349	1.82262	1.37042	2.09813	12.0582	2.98768	4.48824	1.84323	0.726304	0.518462	0.726304	1.87402	3.76969	3.70669	1.87402	3.76969	3.70669	1.7327	0.919025	0.783309
3.125	2.48996	1.86068	3.63991	7.28247	8.65361	6.60299	0.602335	0.548638	1.11128	3.1489	1.71359	2.43287	4.65031	6.72564	48.4748	6.91153	5.6215	8.83987	0.906738	0.968405	0.84507	6.15748	11.5807	8.94291	6.15748	11.5807	8.94291	1.28589	1.58149	0.967982
6.25	9.46871	5.94805	8.5856	28.1744	30.0975	10.7275	1.33774	1.21401	1.67626	11.3002	7.60618	8.345	24.4105	30.9019	71.0168	27.3998	25.1355	30.1657	2.32052	1.1831	1.17625	24.2953	25.128	41.9862	24.2953	25.128	41.9862	1.27722	1.37761	1.00207
12.5	32.4026	43.1452	54.2397	30.521	50.3521	15.9161	3.26148	2.11518	4.14864	36.6021	45.904	40.0895	74.2474	106.986	77.6013	98.5308	68.6047	100.222	0.74686	2.15379	1.02094	121.685	94.8406	128.307	121.685	94.8406	128.307	1.3175	1.67445	1.11547
Surrogate Wnt (nM)	Fzd5 W238A			Fzd5 V281Y			Fzd5 R449A			Fzd5 W520A			Fzd5 W522A			Fzd5 Y507A			Fzd5 K506A			Fzd5 T252F/T534F			Fzd5 wt			Neg Ctrl.
0	0.420307	0.456907	0.507674	1.82006	1.18493	1.20599	0.50428	0.515953	0.602335	0.663954	0.711147	1.26932	1.3642	1.01589	1.26054	0.898096	1.15566	1.83651	0.986677	0.765131	1.26761	1.00787	0.844488	1.26181	0.981281	0.823153	0.679803	0.829787	0.629002	0.777732
0.25	3.38489	2.64227	3.39079	51.2887	39.3752	34.1079	0.352529	0.6	0.520623	2.22945	3.57201	2.51261	13.7436	11.0256	4.4886	12.0582	26.4278	12.7727	0.972973	0.806243	0.831367	12.4606	10.063	12.124	7.48818	6.17734	5.62167	0.883082	0.895476	0.765338
1	7.12161	8.26564	7.85596	72.9976	56.882	51.8241	1.04358	0.555642	0.410895	4.5061	3.47925	2.97803	31.161	20.4112	22.3518	48.4748	40.8264	48.4278	1.08032	0.863342	0.753711	45.6181	37.6969	37.6004	23.1547	15.1463	17.9084	1.02747	0.821111	2.92749
4	10.745	13.2786	9.04604	67.7591	79.2104	51.1003	0.632685	0.590661	0.581323	2.45891	4.12693	3.56225	40.9986	38.1251	24.7588	71.0168	89.0213	91.3191	1.25162	1.14199	1.07118	64.4961	67.9311	72.9272	33.2704	37.6153	40.8695	0.793844	1.46994	0.766577
16	9.56316	9.97166	15.6222	68.9673	46.9403	44.6071	0.688716	0.604669	0.385214	3.64849	4.30594	3.21074	40.3165	33.3483	27.8106	77.6013	76.4323	75.7402	1.41606	0.826799	1.0552	57.3386	86.1594	71.8799	51.0236	31.4039	41.966	1.10556	0.981615	1.02314
