# Supplementary material for: Structure of human Frizzled5 by fiducial-assisted cryo-EM supports a heterodimeric mechanism of canonical Wnt signaling
Source: eLife journal article supplement (doi:10.7554/elife.58464), 2020-08-07
Supplement: supp [file elife-58464-supp-v1.zip]

1 [ 1

Fzd5 30 APVCEITVPMCRG--IGYNITMNFQNHDTQDEAGLEVHQFWPLVE--OCSEDLRFFLCSMYTPICPDYHKPLPFCRSVCERAKAGCSPLMROYCFAWERMSC--DRLPVLGRDAE

Fzd8 32 ELACQETVPLCKG--IGYNTYTMNFQNHDTQDEAGLEVHQFWPLVE--OCSEDLRFFLCSMYTPICEDYKKPLPFCRSVCERAKAGCAPLMROYCFAWDRMRC--DRLEPGG-NED

Fzd1 113 HGCOPIISIPLCD--IAYNCTIMFNLLCHTNQEDAGLEVHQFYPLVKV--OCSEDLRFFLCSMYAPVCTV-LEQALPPCRSLCERARQCEALMNKFCQWEDTKC--EKFPVHG--AG

Fzd2 36 HGFCOPISIPLCD--IAYNCTIMFNLLCHTNQEDAGLEVHQFYPLVKV--OCSEDLRFFLCSMYAPVCTV-LEQAIPPCRSLCERARQCEALMNKFCQWEDTKC--EHFPRHG--AE

Fzd7 46 HGFCOPISIPLCD--IAYNCTILNLLCHTNQEDAGLEVHQFYPLVKV--OCSEDLRFFLCSMYAPVCTV-LQQAIPPCRSICERARQCEALMNKFCQWEDTKC--ENFPVHG--AG

Fzd3 25 LFSCEPITIRMCQD--LEYNITFMFNLLNHYDQQTAAALAMEEFHFMVNL--DCSRDFRFFLCALYAPICME-YGRVTLECRRLCORAYSECCKLMEFGVPEWEDMEC--SRFPDQCD-EPY

Fzd6 21 LFTCEPITVPRCKM--MAYNTTFFNLMCHYDOSIAAVEHEHFLPLANI--ECSNIEITFLCKAEVETCIE-QIHVVPECRKLCEKVYSDDCKKIDTDEGIRWEEETPC--DRLOYCD-ETV

Fzd9 36 AAPCOAVEIPMCRG--IGYNTMNFNLLCHTSQGEAAAEAEAFAPLVQY--GCHSHIRFFLCSLYAPMCDQVSTPIPAACRMCEQRLRCAPIMEQENFGWDSDC--ARLPARN-DPH

Fzd10 31 DGKCEPIETPMCKD--IGYNTMFMFNLLCHENQREAAIQLEHFAPLVEY--GCHGHLRFFLCSLYAPMCEQVSTPIPAACRMCEQRLRCAPIMEQENFGWDSDC--RKLENKN-DEN

Fzd4 42 ERRCQPIRISMCON--LGYNVTMKNLVLGHELOTDABLQLTFTETPLIQY--GCSOLQFFLCVYVPMCTEKNITPIGFCGGMCLSVKRRCEPVIKEEFQWESLNC--SKFPQON-DEN

Smo 67 AAPCELRNVNCLGSLVLYGATSTLLACDSQSEAHGKLVLSGLNRNRCNVAIOPQLCAVYMEKCN--DRVELESRTICQATRGCAIVERER--WDETRCTDPRFEGC-TNE

CRD

linker

hinge domain

121 2

Fzd5 145 VLCMDYNRSEATT--APRPFPAKPTLPG--PPGA--PAGG--ECPAG--GPFV--CKCRPEFVPIKESHPLYNKKVRTG

Fzd8 146 TLMCDYNRDLTT--AAP-SPRRLEPP--PGGQPPSGSGHGRPPGARP-PHRGGGRGGGGDAAAP--PARGGGGGGKARPPGG--GAAPCEPGCCRAPMVSVSSERHPLYNRRVKTG

Fzd1 225 ELCVGQNTSDKGT-PTPSLL--EFWTSNP--QH--GGGGHRRGF--PGGAG--ASER--GKFS--CPRALKVPISYLYNHFLGK--

Fzd2 148 QICVQGNHSE--DGAPALLTAP--PPGQ--GAGGTGG--PGGGG--APPRYATLEHFFH--CPRVLKVPISYLYNFKLGER--

Fzd7 158 EICVQNTSD--GS-GPGGGGTAYTAPYLPD-LP--FTALPPGA--SDCRG--RPA--FFFS--CPROLKVPISYLYNFKLGER--

Fzd3 138 PRLVDNLNLAG--EPTEGAPVAV--RPPGDL--G--ORDYG--FW--CPRELKIDPDLCYSFHV--

Fzd6 134 PVTFDPHTEF--LGFQKKTEQV--ORDIG--FW--CPRELKTSGGQCYKELGID--

Fzd9 150 ALCMAPENATAGPAEPHKLGLMPLVAP--RPA--RPPGDL--G--PGAGG--SGTCENP--EKFOYVEKS--

Fzd10 145 YLCMBEAPNNGS--DEPTRGSGLEPELF-RPQ--RPHSAQEHPLKDG--PCRGG--CDNP--GKFHVEKS--

Fzd4 156 HMCMEPCGDBE--VPL--PHKT--PHQPG--EECH--SVGTNSDOYLVVKRS--

Smo 182 VQNDKENSSEQ--CEVLVLRDNDKPSWVEDVE--

hinge domain

TM1

ICL1

TM2

ECL1

241 3

Fzd5 214 QVPCAVPCYF--SFSADERTFTFWIGLWSVLCFISTSTVATFLIDMERFR--YERPIIF--SACYLCVSLGFLVRLVVGHSVACSRH--

Fzd8 256 QIANCALPCHNP--FFSQDRAFTVFWIGLWSVLCFISTSTVATFLIDMERFK--YERPIIF--SACYLFVSVGYLRLVVGHEKVCACSGGAPGAGGAGGAGAAAGAGAAGAGA

Fzd1 295 --DCGAPC--EPKVGGLMYFEGPEEIRFSRTWIGLWSVLCFASTFTVLTLYLDMRRFS--YERPIIF--SGCYTAVAVAYIAGFLIEDRVVCDKFE--

Fzd2 220 --DCAAPC--EPARPDSGMFFSQEETFRRLWLTWSVLCFASTFTVLTLYLDMQRFR--YERPIIF--SGCYTMVSVAYIAGFVLQERVVCNERFSE--

Fzd7 229 --DCGAPC--EPGRANGLMYFKEERFRRLWVGWVSVLCFASTFTVLTLYLDMRRFS--YERPIIF--SGCYEMVAHVAGFLIEDRAVCVERFSD--

Fzd3 184 --DCSPPC--P--NMYRREELSFARYFGLISLHICSATFTFTFLIDVTRFR--YERPIIF--YAVCYMMVSLIFFIGFLIEDRVACNSIPAQ--

Fzd6 180 --QCAPP--P--NMYRKSDELEF--KSFGTGTVSIFLCATFTFTFLIDVRRFR--YERPIIY--SVCSIVSLMYFTGFLGSDTACNKADEKL--

Fzd9 209 --RSCAPRC--GPG--VEVFSSRRDKDELWMAVWSALCFSTFTVLTFLLEPHRFQ--YERPIIF--SMCNVSVSLAFRLIRAVAGACSVACQDEAG--

Fzd10 205 --ASCAPLC--TPG--VDVYSREKRFRAVWLAIVLFCFFSTFTVLTFLIDPARFR--YERPIIF--SMCCVSVGYLRLVLAGAESIACORDS--

Fzd4 198 --LNCVLKC--GYDAGLYSRSAKEFTDIWMAVWSALCFISTFTVLTFLIDSSRF--YERPIIF--SMCNVSVSLAFRLIRVGRERISOFEEA--

Smo 212 --ECGIQCNF--LFTAEHQDMHSYIAFGAVTGLCTFTFLTEFVADWRNSNR--YAVILFYFNACSEVGSIGWLAQF--MDGARREIVCRAD--

ECL1

TM3

ICL2

TM4

ECL2

TM5

361 4

Fzd5 303 --NHIIHYETTGPALCTIVFLLVYFFGMASLWWVILSLTWFLAAG--KKGNEALAGYAYQYFHLAAWLIPSVKSIITALALSSVD--DPVAGI--CYVGNONNLSLR--FV

Fzd8 368 GPGGGRGEYEELGAVECHVRYETTGPALCTIVFLLVYFFGMASLWWVILSLTWFLAAG--KKGNEALAGYSQYFHLAAWLIPSVKSIIVLALSSVD--DPVAGI--CYVGNOSDNR--CFV

Fzd1 388 --DGARTVA--OGTKKEGCTILEMMLYFFSMASLWWVILSLTWFLAAG--KKGHEALANSQYFHLAAWVPAVKTIITILALQVDD--DVLISGV--CFVGNNDALR--CFV

Fzd2 313 --DGARTVA--OGTKKEGCTILEMMLYFFSMASLWWVILSLTWFLAAG--KKGHEALANSQYFHLAAWVPAVKTIITILAMQVDD--DVLISGV--CFVGNNDALR--CFV

Fzd7 322 --DGARTVA--OGTKKEGCTILEMMLYFFGMASLWWVILSLTWFLAAG--KKGHEALANSQYFHLAAWVPAVKTIITILAMQVDD--DVLISGV--CFVGNNDALR--CFV

Fzd3 272 --YKSTV--QSGSHNKACTMLEMILYFFTMAGSVWWVILSLTWFLAAG--KKGSEALPEKALLFHASAWGIPGTTITILLALNKIECDNLSGV--CFVGLYDVALR--FV

Fzd6 268 --ELCDTV--VLGSQNKACTMLEMILYFFTMAGTVWWVILSLTWFLAAG--RKWSCALPEKAVVHFVAVWCTPGFTITVMLLANKVECDNLSGV--CFVGLYDVALR--FV

Fzd9 300 --ALYVIGEGLTGCITLVEMLLYFFGMASLWWVILSLTWFLAAG--KKGHEALANSQYFHLAAWVPAVKTIITILAMQVDD--DVLISGV--CFVGNNDALR--CFV

Fzd10 296 --QYVYVIGEGLTGCITLVEMLLYFFGMASLWWVILSLTWFLAAG--KKGHEALANSQYFHLAAWVPAVKTIITILAMQVDD--DVLISGV--CFVGNNDALR--CFV

Fzd4 288 --AEPVLVIGEGLTGCITLVEMLLYFFGMASLWWVILSLTWFLAAG--KKGHEALANSQYFHLAAWVPAVKTIITILAMQVDD--DVLISGV--CFVGNNDALR--CFV

Smo 299 --GTMRLGEPSTNET--LSCVLIEVIVYALMAGVWFEVLTLYAWHTSFKALGTTYQPLSKTSYFHLTWSLDFVLTVAI--AAQVDGDSVSGICFVGNKNRYRACFV

TM5

(BRIL) ICL3

TM6

ECL3

TM7

481 5 6

Fzd5 415 LGPLVLYLVGTLFLLAGFVSIFR--RSVIRKQGT--KTDKL--EKLMIIRIGIFTLLYTPASIVVACLYLYEHOHYRESWEAALCACGCHDTGQPR--KPEYVWLM--

Fzd8 486 LAPLVLYLVGTLFLLAGFVSIFR--RSVIRKQDGPPTKTEKL--EKLMIIRIGIFTLLYTPAAVVVACLYLYEHOHNRPRWEATHNCPCFTRDLODQ--R--R--DYAVFEM--

Fzd1 492 LAPLEVLYLVGTLFLLAGFVSIFR--RTINKHDC--KTEKL--EKLMIIRIGVFSVLYTPATVIAICYFYEQAFREHRSWVAQSCSKSYAIPCPHLOAGGGGAPHPMSPDFTVEMI--

Fzd2 417 LAPLEVLYLVGTLFLLAGFVSIFR--RTINKHDC--KTEKL--ERLMVIRIGVFSVLYTPATVIAICYFYEQAFREHRSWVAQSCSKSLAIPCPAHYT--PRMSPDFTVEMI--

Fzd7 426 LAPLEVLYLVGTLFLLAGFVSIFR--RTINKHDC--KTEKL--EKLMIIRIGVFSVLYTPATVIAICYFYEQAFREHRSWVAQSCSKSYAIPCPHLOAGGGGAPHPMSPDFTVEMI--

Fzd3 376 LAPLCLYLVVGVSLLAGIISLNRVRIENPLEKE--NODKL--VKFMIRIGVFSVLYLVELLVVGICYFYEQAYRGLWETTWI--QERCREYHIPCPOV--QMSRPDLILELM--

Fzd6 372 ILPLCLYLVVGVSLLAGIISLNRVRIENPLEKE--NODKL--KKFMIRIGVFSVLYLVELLVVGICYFYEQAYRGLWETTWI--QERCREYHIPCPOV--QMSRPDLILELM--

Fzd9 403 LVLPSGLVLSGLFLLCFVALFHRKINKTGT--NTEKL--EKLMIIRIGVFSVLYTPATVIAICYFYEQAFREHRSWVAQSCSKSLAIPCPAHYT--PRMSPDFTVEMI--

Fzd10 399 LPLACYLVLGTLFLLAGFVSIFR--RTINKHDC--KTEKL--ERLMVIRIGVFSVLYTPATVIAICYFYEQAFREHRSWVAQSCSKSLAIPCPAHYT--PRMSPDFTVEMI--

Fzd4 392 VAPLTYLVGTLFLLAGFVSIFR--RSVIRKQD--KTDKL--ERLMVIRIGVFSVLYTPATVIAICYFYEQAFREHRSWVAQSCSKSLAIPCPAHYT--PRMSPDFTVEMI--

Smo 405 LAPLGLVLYLVGTLFLLAGFVSIFR--RSVIRKQD--KTDKL--SEKASKINETMLRLGIFGLAFGFVLITFSCHEFYDFENQ--EWSRFRDYVLQAN--TIGLTPQIPDCEIKNRSLVLEKI

TM7

H8

601 1

Fzd5 506 KYFMCVLVVGITSVWVWSGKTLESWRRFTRRC--

Fzd8 589 KYFMCVLVVGITSVWVWSGKTLESWRRFTRRC--

Fzd1 606 KYLMLLIVGITSVWVWSGKTLESWRRFTRRL--

Fzd2 524 KYLMLLIVGITSVWVWSGKTLESWRRFTRRL--

Fzd7 533 KYLMLLIVGITSVWVWSGKTLESWRRFTRRL--

Fzd3 483 KYLMLLIVGITSVWVWSGKTLESWRRFTRRL--

Fzd6 479 KYLMLLIVGITSVWVWSGKTLESWRRFTRRL--

Fzd9 513 KYFMCVLVVGITSVWVWSGKTLESWRRFTRRL--

Fzd10 507 KYFMCVLVVGITSVWVWSGKTLESWRRFTRRL--

Fzd4 480 KYFMCVLVVGITSVWVWSGKTLESWRRFTRRL--

Smo 521 NLFAMFGTGLAMTWVTKALILINRRTRCRL--
